# Supplementary material for: Reduced Expression of Annexin A6 Induces Metabolic Reprogramming That Favors Rapid Fatty Acid Oxidation in Triple-Negative Breast Cancer Cells
Source: Cancers (Basel). 2022 Feb 22;14(5):1108. doi: 10.3390/cancers14051108 (PMC8909273; doi:10.3390/cancers14051108)
Supplement: Supplementary file 1 [file cancers-14-01108-s001.zip › cancers-1590119-supplementary.pdf]

# Supplementary Material: Reduced Expression of Annexin A6 Induces Metabolic Reprogramming That Favors Rapid Fatty Acid Oxidation in Triple-Negative Breast Cancer Cells

Stephen D. Williams and Amos M. Sakwe

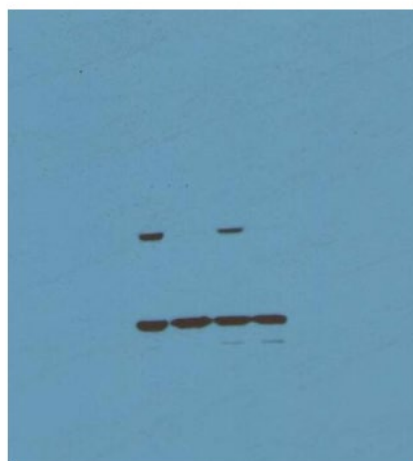

**Lane 1: BT-NSC**

**Lane 2: BT-A6sh5**

**Lane 3: MDA-NSC**

**Lane 4: MDA-A6sh5**

**Figure S1.** The original western blots for figure 1A.

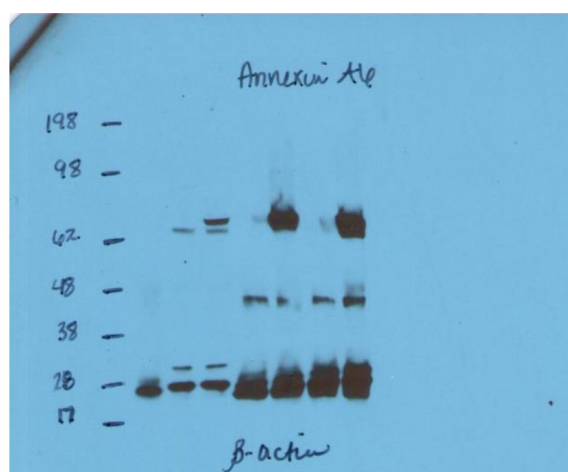

**Lane 2: MDA-468 EV**

**Lane 3: MDA-Flag-A6**

**Figure S2.** The original western blots for figure 2A.

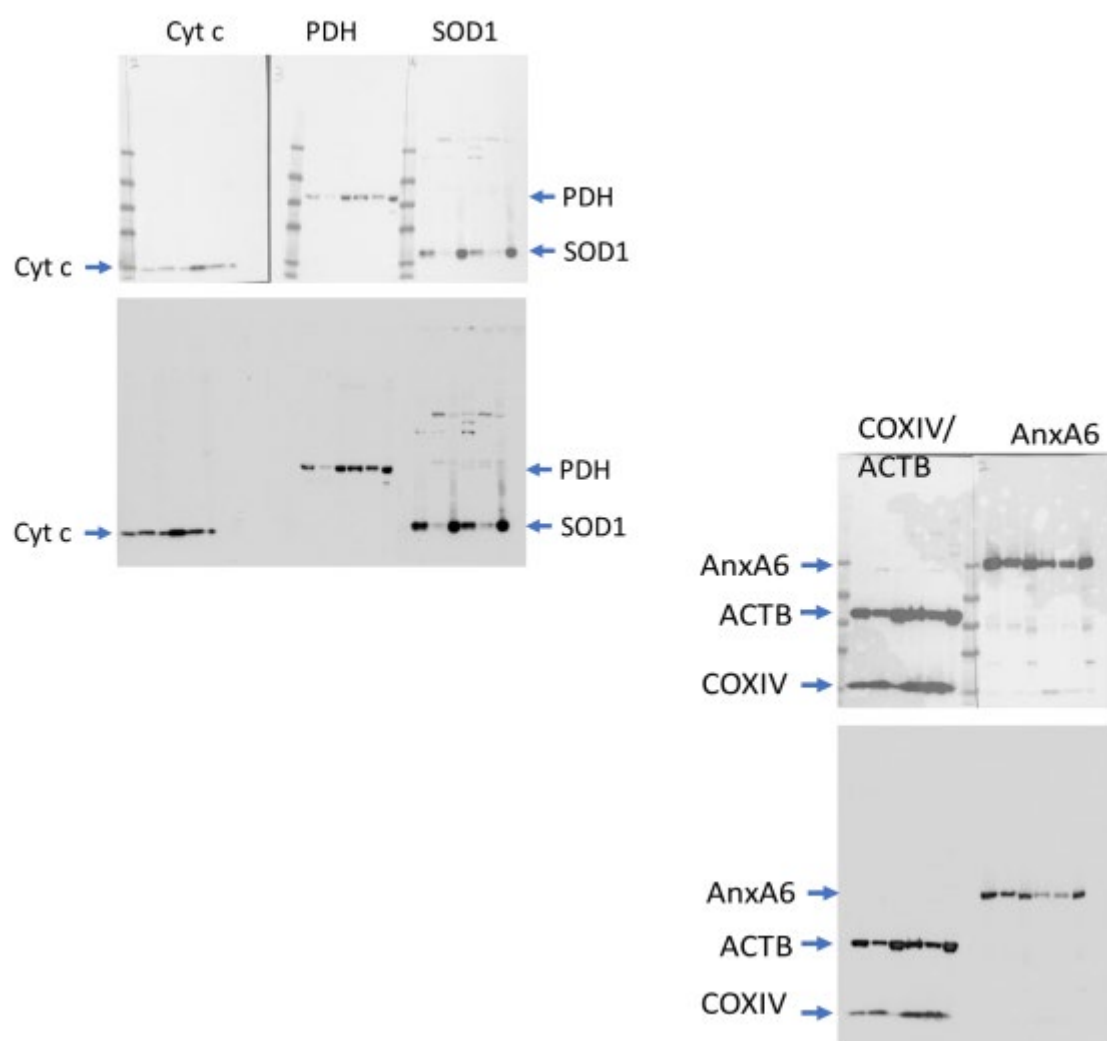

**Figure S3.** The original western blots for figure 3A.

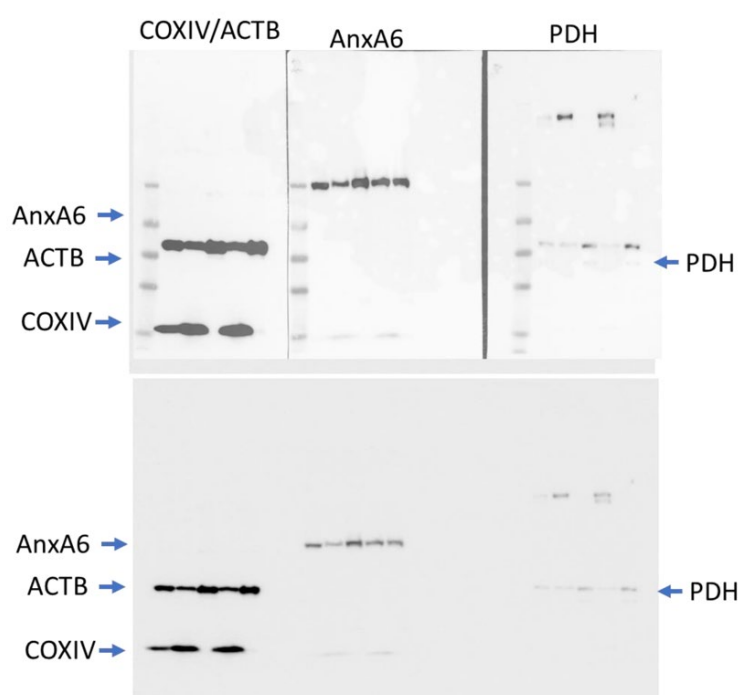

**Figure S4.** The original western blots for figure 3C.

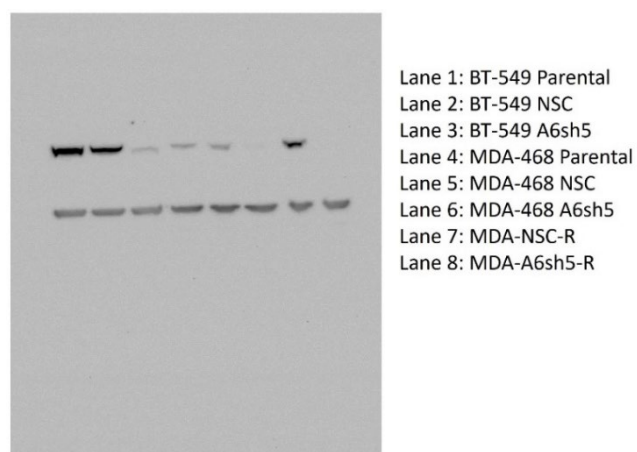

**Figure S5.** The original western blots for figure 5A.
